# Supplementary material for: Preoperative next-generation sequencing of pancreatic cyst fluid is highly accurate in cyst classification and detection of advanced neoplasia
Source: PubMed Central journal article supplement — Gut. 2017 Sep 28;67(12):2131–41. doi: 10.1136/gutjnl-2016-313586 (PMC6241612; doi:10.1136/gutjnl-2016-313586), 2017-09-28
Supplement: gutjnl-2016-313586supp002.pdf [file gutjnl-2016-313586supp002.pdf]

**Supplementary Table 1. Genetic variants identified in pancreatic cyst fluid.**

| Variant                      | Number (%) |
|------------------------------|------------|
| <i>KRAS</i>                  |            |
| p.G12D, c.35G>A              | 95 (15%)   |
| p.G12V, c.35G>T              | 85 (14%)   |
| p.G12R, c.34G>C              | 48 (8%)    |
| p.G12I, c.34_35GG>AT         | 2 (1%)     |
| p.G13D, c.38G>A              | 7 (1%)     |
| p.Q61H, c.183A>C             | 16 (3%)    |
| p.Q61H, c.183A>T             | 7 (1%)     |
| p.Q61R, c.182A>G             | 9 (1%)     |
| p.Q61K, c.181C>A             | 1 (1%)     |
| p.Q61L, c.182_183AdelAAinsTC | 1 (1%)     |
| p.Q61L, c.182A>T             | 1 (1%)     |
| <i>GNAS</i>                  |            |
| p.R201H, c.602G>A            | 94 (15%)   |
| p.R201C, c.601C>T            | 63 (10%)   |
| p.R201S, c.601C>A            | 6 (1%)     |
| p.Q227E, c.679C>G            | 3 (1%)     |
| <i>BRAF</i>                  |            |
| p.T599I, c.1796C>T           | 2 (1%)     |
| p.V600E, c.1799T>A           | 1 (1%)     |
| p.K601N, c.1803A>T           | 1 (1%)     |
| p.Q612*, c.1834C>T           | 1 (1%)     |
| <i>CTNNB1</i>                |            |
| p.S45F, c.134C>T             | 2 (1%)     |
| p.S45Y, c.134C>A             | 1 (1%)     |
| p.T41A, c.121A>G             | 1 (1%)     |
| <i>TP53</i>                  |            |
| p.R273H, c.818G>A            | 6 (1%)     |
| p.R175H, c.524G>A            | 3 (1%)     |
| p.R248W, c.742C>T            | 2 (1%)     |
| p.R110L, c.329G>T            | 1 (1%)     |
| p.R181C, c.541C>T            | 1 (1%)     |
| p.R181P, c.542G>C            | 1 (1%)     |
| p.G199L, c.595_596GG>TT      | 1 (1%)     |
| p.Y234C, c.701A>G            | 1 (1%)     |
| p.S241F, c.722C>T            | 1 (1%)     |
| p.C242fs*5, c.722delC        | 1 (1%)     |
| p.G245S, c.733G>A            | 1 (1%)     |
| p.N247IS, c.740A>T           | 1 (1%)     |
| p.D259Y, c.775G>T            | 1 (1%)     |
| p.G266R, c.796G>C            | 1 (1%)     |
| p.V274F, c.820G>T            | 1 (1%)     |
| p.R280T, c.839G>C            | 1 (1%)     |
| Homozygous deletion*         | 2 (1%)     |
| <i>PIK3CA</i>                |            |
| p.H1047R, c.3140A>G          | 3 (1%)     |
| p.E542K, c.1624G>A           | 3 (1%)     |
| p.E545K, c.1633G>A           | 2 (1%)     |
| p.Q546R, c.1637A>G           | 1 (1%)     |
| p.Q546H, c.1638G>T           | 1 (1%)     |
| p.Y1021C, c.3062A>G          | 1 (1%)     |
| p.H1047Y, c.3139C>T          | 1 (1%)     |
| <i>PTEN</i>                  |            |
| T321fs*1                     | 1 (1%)     |
| Homozygous deletion*         | 1 (1%)     |
| <i>AKT1</i>                  |            |
| p.E17K, c.49G>A              | 1 (1%)     |

\*Deletion is based on low sequencing coverage of amplicons for the gene of interest.
