# Supplementary material for: Preoperative next-generation sequencing of pancreatic cyst fluid is highly accurate in cyst classification and detection of advanced neoplasia
Source: PubMed Central journal article supplement — Gut. 2017 Sep 28;67(12):2131–41. doi: 10.1136/gutjnl-2016-313586 (PMC6241612; doi:10.1136/gutjnl-2016-313586), 2017-09-28
Supplement: gutjnl-2016-313586supp003.pdf [file gutjnl-2016-313586supp003.pdf]

|     |        |    |     |         |         |         |        |        |        |        |        |        |        |        |        |                       |
|-----|--------|----|-----|---------|---------|---------|--------|--------|--------|--------|--------|--------|--------|--------|--------|-----------------------|
| 82  | Female | 35 | 6.8 | Absent  | Absent  | Absent  | Absent | Absent | Absent | Absent | Absent | Absent | Absent | Absent | Absent | Pseudocyst            |
| 83  | Male   | 61 | 7.8 | Absent  | Absent  | Absent  | Absent | Absent | Absent | Absent | Absent | Absent | Absent | Absent | Absent | Pseudocyst            |
| 84  | Female | 54 | 1.5 | Absent  | Absent  | Absent  | Absent | Absent | Absent | Absent | Absent | Absent | Absent | Absent | Absent | Pseudocyst            |
| 85  | Female | 56 | 2.2 | Absent  | Present | Absent  | Absent | Absent | Absent | Absent | Absent | Absent | Absent | Absent | Absent | Pseudocyst            |
| 86  | Female | 64 | 8.0 | Absent  | Absent  | Absent  | Absent | Absent | Absent | Absent | Absent | Absent | Absent | Absent | Absent | Pseudocyst            |
| 87  | Male   | 56 | 6.0 | Absent  | Absent  | Absent  | Absent | Absent | Absent | Absent | Absent | Absent | Absent | Absent | Absent | Pseudocyst            |
| 88  | Female | 76 | 8.6 | Present | Absent  | Absent  | Absent | Absent | Absent | Absent | Absent | Absent | Absent | Absent | Absent | Pseudocyst            |
| 89  | Male   | 49 | 3.6 | Absent  | Present | Absent  | Absent | Absent | Absent | Absent | Absent | Absent | Absent | Absent | Absent | Pseudocyst            |
| 90  | Female | 77 | 2.2 | Absent  | Absent  | Absent  | Absent | Absent | Absent | Absent | Absent | Absent | Absent | Absent | Absent | Pseudocyst            |
| 91  | Male   | 69 | 2.1 | Absent  | Absent  | Absent  | Absent | Absent | Absent | Absent | Absent | Absent | Absent | Absent | Absent | Pseudocyst            |
| 92  | Male   | 49 | 3.6 | Absent  | Absent  | Absent  | Absent | Absent | Absent | Absent | Absent | Absent | Absent | Absent | Absent | Pseudocyst            |
| 93  | Female | 34 | 4.2 | Absent  | Absent  | Absent  | Absent | Absent | Absent | Absent | Absent | Absent | Absent | Absent | Absent | Pseudocyst            |
| 94  | Female | 71 | 2.6 | Absent  | Absent  | Absent  | Absent | Absent | Absent | Absent | Absent | Absent | Absent | Absent | Absent | Pseudocyst            |
| 95  | Female | 62 | 7.0 | Absent  | Absent  | Absent  | Absent | Absent | Absent | Absent | Absent | Absent | Absent | Absent | Absent | Pseudocyst            |
| 96  | Female | 73 | 0.9 | Absent  | Absent  | Absent  | Absent | Absent | Absent | Absent | Absent | Absent | Absent | Absent | Absent | Pseudocyst            |
| 97  | Female | 52 | 2.1 | Absent  | Absent  | Present | Absent | Retention cyst        |
| 98  | Female | 70 | 4.5 | Absent  | Absent  | Absent  | Absent | Absent | Absent | Absent | Absent | Absent | Absent | Absent | Absent | Retention cyst        |
| 99  | Male   | 48 | 4.2 | Absent  | Absent  | Absent  | Absent | Absent | Absent | Absent | Absent | Absent | Absent | Absent | Absent | Lymphoepithelial cyst |
| 100 | Male   | 63 | 2.6 | Absent  | Absent  | Absent  | Absent | Absent | Absent | Absent | Absent | Absent | Absent | Absent | Absent | Lymphoepithelial cyst |
| 101 | Male   | 73 | 2.1 | Absent  | Absent  | Absent  | Absent | Absent | Absent | Absent | Absent | Absent | Absent | Absent | Absent | Epidermoid cyst       |
| 102 | Female | 55 | 2.2 | Absent  | Absent  | Absent  | Absent | Absent | Absent | Absent | Absent | Absent | Absent | Absent | Absent | Squamoid cyst         |

Abbreviations: AdenoCA, adenocarcinoma; IPMN, intraductal papillary mucinous neoplasm; MAF, mutant allele frequency; MCN, mucinous cystic neoplasm; PanNET, pancreatic neuroendocrine tumor

\*Malignant cytopathology was defined as either at least suspicious for adenocarcinoma.

\*\*Homozygous deletion is based on low sequencing coverage of amplicons for the gene of interest.
