# Supplementary material for: Preoperative next-generation sequencing of pancreatic cyst fluid is highly accurate in cyst classification and detection of advanced neoplasia
Source: PubMed Central journal article supplement — Gut. 2017 Sep 28;67(12):2131–41. doi: 10.1136/gutjnl-2016-313586 (PMC6241612; doi:10.1136/gutjnl-2016-313586), 2017-09-28
Supplement: gutjnl-2016-313586supp004.pdf [file gutjnl-2016-313586supp004.pdf]

**Supplementary Table 3. Clinical and pathologic characteristics of 153 patients with pancreatic cysts and correlation with *KRAS* and *GNAS* status by Sanger sequencing.**

| Patient or Cyst Characteristics                                       | Total            | <i>KRAS</i> and/or <i>GNAS</i> |                 | p          |
|-----------------------------------------------------------------------|------------------|--------------------------------|-----------------|------------|
|                                                                       |                  | wildtype                       | mutant          |            |
| Gender                                                                | <i>n</i> = 153   |                                |                 |            |
| Female                                                                | 83               | 56 (67%)                       | 27 (44%)        | 0.100      |
| Male                                                                  | 70               | 38 (54%)                       | 32 (46%)        |            |
| Mean age (range), years                                               | 64.4 (15 - 93)   | 60.2 (15 - 90)                 | 68.9 (34 - 93)  | < 0.001    |
| Symptomatic presentation                                              | 48               | 33 (69%)                       | 15 (31%)        | 0.002      |
| Location                                                              | <i>n</i> = 159   |                                |                 |            |
| Head, neck and uncinata                                               | 79               | 42 (53%)                       | 37 (47%)        | 0.052      |
| Body and tail                                                         | 80               | 181 (59%)                      | 125 (41%)       |            |
| Mean cyst size (range), cm                                            | 3.0 (0.9 - 14.0) | 3.3 (0.9 - 14.0)               | 2.4 (0.9 - 6.5) | 0.006      |
| Cyst multifocality                                                    | 90               | 44 (49%)                       | 46 (51%)        | 0.001      |
| Increased fluid viscosity                                             | 72               | 26 (36%)                       | 46 (64%)        | < 0.001    |
| CEA > 192 ng/mL ( <i>n</i> = 127)*                                    | 40               | 14 (35%)                       | 26 (65%)        | < 0.001    |
| Satisfactory cytologic adequacy                                       | 84               | 54 (64%)                       | 30 (36%)        | 0.417      |
| Mutations in <i>KRAS</i> and/or <i>GNAS</i> by NGS ( <i>n</i> = 24)** | 11               | 3 (27%)                        | 8 (73%)         | < 0.001    |
| Diagnostic pathology                                                  | <i>n</i> = 34    | <i>n</i> = 21                  | <i>n</i> = 13   |            |
| Adenocarcinoma arising in an IPMN                                     | 5                | 2 (40%)                        | 3 (60%)         | < 0.001*** |
| IPMN with low-/high-grade dysplasia                                   | 13               | 3 (23%)                        | 10 (77%)        |            |
| MCN with low-/high-grade dysplasia                                    | 2                | 2 (100%)                       | 0 (0%)          |            |
| Serous cystadenoma                                                    | 3                | 3 (100%)                       | 0 (0%)          |            |
| Cystic PanNET                                                         | 2                | 2 (100%)                       | 0 (0%)          |            |
| Acinar cell cystadenoma                                               | 1                | 1 (100%)                       | 0 (0%)          |            |
| Pseudocyst                                                            | 6                | 6 (100%)                       | 0 (0%)          |            |
| Retention cyst                                                        | 2                | 2 (100%)                       | 0 (0%)          |            |

Abbreviations: CEA, carcinoembryonic antigen; IPMN, intraductal papillary mucinous neoplasm; MCN, mucinous cystic neoplasm; PanNET, pancreatic neuroendocrine tumor

\*Sufficient pancreatic cyst fluid for CEA analysis was available for 127 (80%) pancreatic cysts.

\*\*Follow-up NGS testing for *KRAS* and *GNAS* was performed for 24 (15%) pancreatic cysts.

\*\*\*p-value corresponds to mucinous pancreatic cysts versus other pancreatic cysts.
